# Supplementary material for: Enhancing Structural Crack Detection through a Multiscale Multilevel Mask Deep Convolutional Neural Network and Line Similarity Index
Source: Hindawi journal article supplement (doi:10.1155/2023/8212790), 2023-01-01
Supplement: f1 [file 8212790.f1.pdf]

Supplementary Material

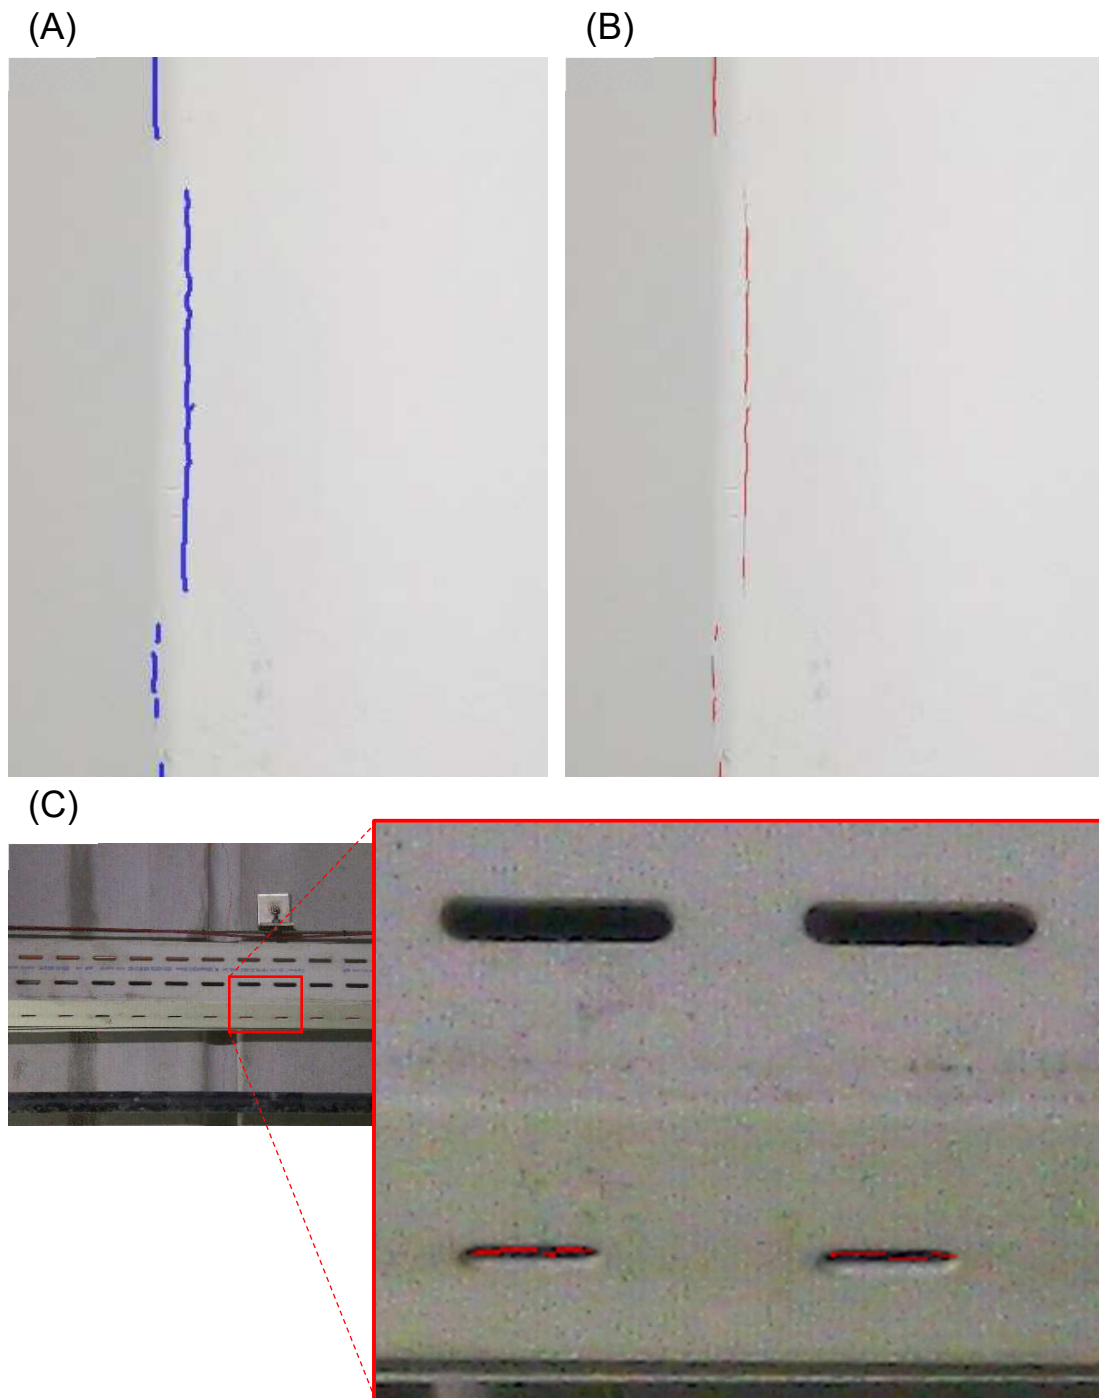

Figure S1. Partially zoomed-in image of (A) (B-2) in Figure 11, (B) (B-3) in Figure 11, and (C) (C-4) in Figure 12.
